# Supplementary material
Source: Research Square preprint supplement (doi:10.21203/rs.3.rs-8969648/v1)
Supplement: Supplementary file 1 [file 1705ae81f0a6859b7b98aa00.docx]

**APPENDICES**

# APPENDIX 1: QUESTIONNAIRE

TOPIC:IMMUNIZATION COVERAGE AMONG CHILDREN 0-11 MONTHS AND CHALLENGES TO COMPLETE VACCINATION IN NKAMBE HEALTH DISTRICT, NORTH WEST REGION

Dear Respondent,

I am Mbunwe Benard Karachu, a final year Masters in Public Health student in the Department of Public Health and Hygiene of the Faculty of Health Sciences in the University of Buea. I am conducting a research on the above-mentioned topic. You have been randomly selected to participate in this study. Your participation is voluntary. Kindly respond appropriately to the following questions. The answers provided will be treated with strict confidentiality and shall be used only for academic purposes. The interview will last 10 – 15 minutes

Code: ____________ Date: ______________ Name of Interviewer: _______________________ Health Area_________________ Health Facility_________________________________

1. **Sociodemographic Information Guardian**

| **S/N** | **Question** | **Response** |
| --- | --- | --- |
| 1 | Age of guardian (in years) | [ ] |
| 2 | Marital status  1=Married 2=Single 3= divorced 4=widowed 5=cohabitating | [ ] |
| 3 | Religion  1=Christian 2=Muslim 3=No religion 4=Others (specify __________) | [ ] |
| 4 | Level of education  1=None 2=Primary 3=Secondary 4=Advance Level 5= University degree | [ ] |
| 5 | Profession  1=Office work 2=Business 3=Farming 4=House wife 5= others (specify) __________) | [ ] |
| 6 | Estimated monthly income (in FCFA/month) | [ ] |
| 7 | Husband/ Partner’s Profession  1=Office work 2=Business 3=Farming 4=Others (specify __________) | [ ] |
| 8 | What is his estimated monthly income? (in FCFA/month) | [ ] |
| 9 | How many children do you have? | [ ] |

1. **Vaccination Status of the Child**.

| 10 | How old is the child | [ ] |
| --- | --- | --- |
| 11 | Has the child been vaccinated?  1=Yes 2=No | [ ] |
| 12 | If NO, what are the reasons? ________________________  ________________________________________________________ |  |
| 13 | Does the child have a vaccination card?  1=Yes 2=No | [ ] |
| 14 | If Yes is the vaccination status complete?  1=Yes 2=No | [ ] |

| Required age of vaccination | Vaccine | Status (Yes or no) |
| --- | --- | --- |
| At birth | BCG |  |
| OPV O |  |
| 6 weeks | DPT-HepBHib 1 |  |
| OPV1 |  |
| Pneumo 13-1  (pcv) |  |
| ROTA 1 |  |
| 10 weeks | DPT-Hep-Hib 2 |  |
| OPV2 |  |
| Pneumo 13-2  ROTA 2 |  |
| 14 weeks | DTP-HEB+Hib3 |  |
| OPV3  IPV |  |
| Pnuemo 13-3 |  |
| 6 to 11 months | Vit A |  |
| At 9 months | Measles |  |
| YF |  |

1. **Antenatal and post Natal**

| 15 | Did you attend antenatal clinic?  1=Yes 2=No | [ ] |
| --- | --- | --- |
| 16 | How many times did you received Antenatal care during pregnancy? | [ ] |
| 17 | Where did you put birth the baby?  1= Home 2= Health facility 3= Other (specify)…………………………………. | [ ] |
| 18 | What is the birth order? | [ ] |
| 19 | What is the sex of the child?  1= Male 2=Female | [ ] |

**C) Immunization and associated challenges**

| 20 | What is the approximate distance (**Km**) between your house and the nearest health unit? i.e. Clinic, dispensary, hospital, or health center | [ ] |
| --- | --- | --- |
|  | Is distance a problem to bring your child for vaccination?  1= Yes 2= No | [ ] |
| 21 | What is your means of transport when you are going to the hospital?  1=Foot 2= Motorcycle 3= vehicle 4= others (specify)……………………………… | [ ] |
| 22 | Do you perceive the awaiting time for the next vaccination sessions too long for you? 1= Yes 2= No | [ ] |
| 23 | Are you informed about the importance of vaccination?  1= Yes 2= No | [ ] |
| 24 | Are you informed by the health workers about the adverse effects following immunization?  1= Yes 2= No | [ ] |
| 25 | If yes, are you advised by the health workers on how to manage the situation?  1= Yes 2= No | [ ] |
| 26 | How do you get information about Vaccination?  1=Radio, 2=television, 3=churches, 4= town crier 5= no information,  6= others(specify)………………………………. | [ ] |
| 27 | Do you know the vaccination schedule for your child (when and which vaccine your child has to take)?  1= Yes 2= No | [ ] |
| 28 | Have there been times you had to vaccinate your child and you did not go?  1= yes 2= No | [ ] |
| 29 | If your answer to (28) above is yes, why?  1=Insecurity 2= Lack of transport 3= others (specify)………………………………. |  |
| 30 | Have you ever gone to the hospital for vaccination and ended up not vaccinating your child?  1= Yes 2 =No | [ ] |
| 31 | If yes give reason and select all that apply  1=vaccine stock out, 2=Absence of health worker, 3=childhood illness  4= others (specify)--------------------------------------------------- | [ ] |
| 32 | How are you treated by the health workers when you go for vaccination?  1= Friendly 2= Rude | [ ] |

**IN-DEPTH INTERVIEW GUIDE**

**TOPIC: IMMUNIZATION COVERAGE AMONG CHILDREN 0-11MONTHS AND CHALLENGES TO COMPLETE VACCINATION IN NKAMBE HEALTH DISTRICT, NORTH WEST REGION OF CAMEROON.**

LIST OF PARTICIPANTS

| **SN** | **Participant**  **identifier** | **Health**  **Facility** | **Sex** | **Age** | **Qualification** | **Function** | **Sign** |
| --- | --- | --- | --- | --- | --- | --- | --- |
| **1** |  |  |  |  |  |  |  |

**Step 1: Introduction**

- Thank the participant for accepting to take part in this discussion.
- Introduce yourself and the note taker. Note the place of the IDI and start time.
- Explain the objective of the study.
- Explain the principles of the discussion: Discussion will be tape-recorded;

Re-iterate the principle of confidentiality.

- State the duration of the session (30– 45 minutes).

**Step 2 (a):** **Immunization Challenges**

1. Tell me about vaccination in your Health Facility
2. what is the staffing situation of your Health Facility?
3. What is the situation of your cold chain?
4. What is your distance to the health district where vaccines are stored and how do you find this distance?
5. What can you say about vaccine supply in your HF?
6. I want to find if from time to time you receive formal training on vaccination
7. Have you received any formal training on immunization since you became in charge of vaccination?
8. How have the present sociopolitical crises in the country affected vaccination in your Health Facility?
9. How does the fact that some vaccines don’t respect the open vial policy poses a challenge to vaccination in your Health Facility?

# APPENDIX 2: INFORMED CONSENT/CONSENT FORM

Informed Consent Form for Parents/guardians of children 0-11months for the study entitled **“**Immunization coverage among children 0-11 months and Challenges to complete vaccination in Nkambe Health District, North West Region**”**.

Department of Public Health and Hygiene, Faculty of Health Sciences, University of Buea, Cameroon

Name of Principal Investigator: Mbunwe Benard Karachu

Information sheet:

Dear Parent/guardian,

Invitation into the study

We kindly ask you to participate and enroll yourself into this study, which we will proceed to describe. This study is focused on assessing the factors associated to immunization coverage, so as to provide information on the improvement of the vaccination coverage consequently reduce mortality and morbidity due to vaccine preventable diseases.

Voluntary Participation

We will like to start by stressing that this study will strictly be voluntary. If you decide that you will not participate in the study, it will have no consequences on you. Should you, at any point in time during the study, decide that you do not wish to participate any further, you are free to terminate your participation. Any such decision will be respected without any further discussion and you will not be penalized in any way.

Study Protocol

We will be requesting information on you age, marital status, level of education, monthly income, religion, occupation.

Risks

No risk is involved in this study. However, we shall request your personal information.

Benefits

Information gathered from this study shall be used to propose solutions to improve accessibility to immunization services.

Confidentiality

All information gathered will be treated with strict confidentiality. You will be given a code number, not names and you will not be identified during the publication of results.

Ethical Clearance

Ethical clearance for the study has been obtained from the Faculty of Health Sciences Institutional Review Board (FHSIRB) of the University of Buea, and Administrative clearance from the North West Regional Delegation of Health.

Contacts

If you have any question concerning this study, please feel free to contact the following:

Mbunwe Benard Karachu Prof Tendongfor Nicholas

(Investigator) (Supervisor)

Master student HOD,

Public Health Department of public Health

676737931 676927690

[mbunwebenard@mail.com](mailto:mbunwebenard@mail.com) [ntendongfor@gmail.com](mailto:ntendongfor@gmail.com)

Consent Form

I……………………………………………………… haven understood the study, after having read the study/consent form thoroughly explained to me, haven been given the opportunity to ask questions and time to consider my participation in this study, I hereby agree to enroll myself to participate in the study.

………………………………………………..

Name/signature of participant/date

………………………………………………… ..…………………………………….

Name/signature of investigator/date name/signature of witness

(For non-literate persons)
